# Supplementary material for: Fecal host biomarkers predicting severity of Clostridioides difficile infection
Source: JCI journal article supplement (doi:10.1172/jci.insight.142976), 2020-11-24
Supplement: sd2 [file 2]

| Protein ID | Interaction Name                                   | Species                 | Interaction Type     | Interactor Type   |
|------------|----------------------------------------------------|-------------------------|----------------------|-------------------|
| P01009     | LGALS3 interacts with SERPINA1                     | Homo sapiens            | physical association | protein - protein |
| P01009     | RB1 interacts with SERPINA1                        | Homo sapiens            | physical association | protein - dna     |
| P01009     | NCOA2 interacts with SERPINA1                      | Homo sapiens            | physical association | protein - dna     |
| P01009     | SERPINA1 interacts with ADAMTS4                    | Homo sapiens            | physical association | protein - protein |
| P01009     | HNF1A interacts with SERPINA1                      | Homo sapiens            | physical association | protein - dna     |
| P01009     | ECHS1 physically interacts with SERPINA1           | Homo sapiens            | physical interaction | protein - protein |
| P01009     | ZNF558 interacts with SERPINA1                     | Homo sapiens            | physical association | protein - protein |
| P01009     | RCHY1 physically interacts with SERPINA1           | Homo sapiens            | physical interaction | protein - protein |
| P01009     | SDC2 physically interacts with SERPINA1            | Homo sapiens            | physical interaction | protein - protein |
| P01009     | SERPINA1 interacts with VCP                        | Homo sapiens            | physical association | protein - protein |
| P01009     | SERPINA1 interacts with KLK3                       | Homo sapiens            | physical association | protein - protein |
| P01009     | SERPINA1 interacts with CANX                       | Homo sapiens            | physical association | protein - protein |
| P01009     | PRSS3 interacts with SERPINA1                      | Homo sapiens            | physical association | protein - protein |
| P01009     | SERPINA1 physically interacts with PRTN3           | Homo sapiens            | physical interaction | protein - protein |
| P01009     | PI3 physically interacts with SERPINA1             | Homo sapiens            | physical interaction | protein - protein |
| P01009     | SERPINA1 physically interacts with LOC780933       | Homo sapiens/Bos taurus | physical interaction | protein - protein |
| P01009     | SERPINA1 interacts with MIS12                      | Homo sapiens            | physical association | protein - protein |
| P01009     | SERPINA1 physically interacts with KLK13           | Homo sapiens            | physical interaction | protein - protein |
| P01009     | SERPINA1 interacts with OS9                        | Homo sapiens            | physical association | protein - protein |
| P01009     | GZMM interacts with SERPINA1                       | Homo sapiens            | physical association | protein - protein |
| P01009     | Cleavage reaction involving GZMM and SERPINA1      | Homo sapiens            | protein cleavage     | protein - protein |
| P01009     | SSR1 interacts with SERPINA1                       | Homo sapiens            | physical association | protein - protein |
| P01009     | HNF4A interacts with SERPINA1                      | Homo sapiens            | association          | protein - dna     |
| P01009     | GSDMB physically interacts with SERPINA1           | Homo sapiens            | physical interaction | protein - protein |
| P01009     | ATP5C1 physically interacts with SERPINA1          | Homo sapiens            | physical interaction | protein - protein |
| P01009     | E2F4 interacts with SERPINA1                       | Homo sapiens            | physical association | protein - dna     |
| P01009     | FN1 interacts with SERPINA1                        | Homo sapiens            | physical association | protein - protein |
| P01009     | SERPINA1 physically interacts with RAP2A           | Homo sapiens            | physical interaction | protein - protein |
| P01009     | DERL1 interacts with SERPINA1                      | Homo sapiens            | physical association | protein - protein |
| P01009     | SERPINA1 physically interacts with LOC100848132    | Homo sapiens/Bos taurus | physical interaction | protein - protein |
| P01009     | SERPINA1 physically associates with SERPINA1       | Homo sapiens            | physical association | protein - protein |
| P01009     | CTSG interacts with SERPINA1                       | Homo sapiens            | physical association | protein - protein |
| P01009     | HNF4A interacts with SERPINA1                      | Homo sapiens            | physical association | protein - dna     |
| P01009     | ERLEC1 interacts with SERPINA1                     | Homo sapiens            | physical association | protein - protein |
| P01009     | SERPINA1 interacts with DERL2                      | Homo sapiens            | physical association | protein - protein |
| P01009     | SERPINA1 physically interacts with SMAD4           | Homo sapiens            | physical interaction | protein - protein |
| P01009     | SERPINA1 physically interacts with VKORC1          | Homo sapiens            | physical interaction | protein - protein |
| P01009     | UBC interacts with SERPINA1                        | Homo sapiens            | physical association | protein - protein |
| P01009     | Complex of 3 interactors                           | Homo sapiens/Bos taurus | physical association | protein - protein |
| P01009     | Cleavage reaction involving LOC780933 and SERPINA1 | Bos taurus/Homo sapiens | cleavage             | protein - protein |
| P01009     | SERPINA1 interacts with LRP1                       | Homo sapiens            | physical association | protein - protein |
| P01009     | SERPINA1 interacts with HNF1A                      | Homo sapiens            | physical association | protein - dna     |
| P01009     | SERPINA1 interacts with HNF4A                      | Homo sapiens            | physical association | protein - dna     |
| P01009     | ELANE interacts with SERPINA1                      | Homo sapiens            | physical association | protein - protein |
| P01023     | IGSF8 physically interacts with A2M                | Homo sapiens            | physical interaction | protein - protein |
| P01023     | RNF32 physically interacts with A2M                | Homo sapiens            | physical interaction | protein - protein |
| P01023     | LGALS3 interacts with A2M                          | Homo sapiens            | physical association | protein - protein |
| P01023     | H2AFX interacts with A2M                           | Homo sapiens            | physical association | protein - protein |
| P01023     | EXOSC1 physically interacts with A2M               | Homo sapiens            | physical interaction | protein - protein |
| P01023     | FIS1 physically interacts with A2M                 | Homo sapiens            | physical interaction | protein - protein |
| P01023     | A2M physically interacts with SEPT8                | Homo sapiens            | physical interaction | protein - protein |
| P01023     | EGLN2 physically interacts with A2M                | Homo sapiens            | physical interaction | protein - protein |
| P01023     | LCAT physically interacts with A2M                 | Homo sapiens            | physical interaction | protein - protein |
| P01023     | A2M interacts with CFTR                            | Homo sapiens            | physical association | protein - protein |

|        |                                                            |                                    |              |                      |                   |
|--------|------------------------------------------------------------|------------------------------------|--------------|----------------------|-------------------|
| P01023 | SMN1                                                       | interacts with A2M                 | Homo sapiens | physical association | protein - protein |
| P01023 | MLST8                                                      | physically interacts with A2M      | Homo sapiens | physical interaction | protein - protein |
| P01023 | NOS3                                                       | physically interacts with A2M      | Homo sapiens | physical interaction | protein - protein |
| P01023 | A2M                                                        | interacts with MMP2                | Homo sapiens | physical association | protein - protein |
| P01023 | CDC37                                                      | physically interacts with A2M      | Homo sapiens | physical interaction | protein - protein |
| P01023 | A2M                                                        | physically interacts with H2AFX    | Homo sapiens | physical interaction | protein - protein |
| P01023 | A2M                                                        | interacts with TP63                | Homo sapiens | physical association | protein - protein |
| P01023 | NCDN                                                       | physically interacts with A2M      | Homo sapiens | physical interaction | protein - protein |
| P01023 | LCAT                                                       | interacts with A2M                 | Homo sapiens | physical association | protein - protein |
| P01023 | ECSIT                                                      | physically interacts with A2M      | Homo sapiens | physical interaction | protein - protein |
| P01023 | APP                                                        | physically interacts with A2M      | Homo sapiens | physical interaction | protein - protein |
| P01023 | PRDX2                                                      | physically interacts with A2M      | Homo sapiens | physical interaction | protein - protein |
| P01023 | A2M                                                        | physically interacts with GEM      | Homo sapiens | physical interaction | protein - protein |
| P01023 | IL1B                                                       | interacts with A2M                 | Homo sapiens | physical association | protein - protein |
| P01023 | IL10                                                       | physically interacts with A2M      | Homo sapiens | physical interaction | protein - protein |
| P01023 | ADAMTS1                                                    | interacts with A2M                 | Homo sapiens | physical association | protein - protein |
| P01023 | A2M                                                        | interacts with GZMA                | Homo sapiens | physical association | protein - protein |
| P01023 | PAEP                                                       | physically interacts with A2M      | Homo sapiens | physical interaction | protein - protein |
| P01023 | A2M                                                        | interacts with KLK3                | Homo sapiens | physical association | protein - protein |
| P01023 | ELAVL3                                                     | physically interacts with A2M      | Homo sapiens | physical interaction | protein - protein |
| P01023 | CYP2C8                                                     | physically interacts with A2M      | Homo sapiens | physical interaction | protein - protein |
| P01023 | ATP1A1                                                     | physically interacts with A2M      | Homo sapiens | physical interaction | protein - protein |
| P01023 | A2M                                                        | interacts with LGALS8              | Homo sapiens | physical association | protein - protein |
| P01023 | A2M                                                        | interacts with NUDT21              | Homo sapiens | physical association | protein - protein |
| P01023 | Cleavage reaction involving ADAMTS7 and A2M                |                                    | Homo sapiens | protein cleavage     | protein - protein |
| P01023 | Cleavage reaction involving ADAMTS12 and A2M               |                                    | Homo sapiens | protein cleavage     | protein - protein |
| P01023 | A2M                                                        | interacts with LGALS9              | Homo sapiens | physical association | protein - protein |
| P01023 | A2M                                                        | physically interacts with RAP1B    | Homo sapiens | physical interaction | protein - protein |
| P01023 | FBXW4                                                      | physically interacts with A2M      | Homo sapiens | physical interaction | protein - protein |
| P01023 | A2M                                                        | physically interacts with CDC42    | Homo sapiens | physical interaction | protein - protein |
| P01023 | TTR                                                        | interacts with A2M                 | Homo sapiens | physical association | protein - protein |
| P01023 | A2M                                                        | physically interacts with HSPA5    | Homo sapiens | physical interaction | protein - protein |
| P01023 | A2M                                                        | interacts with APP                 | Homo sapiens | physical association | protein - protein |
| P01023 | APOE                                                       | physically interacts with A2M      | Homo sapiens | physical interaction | protein - protein |
| P01023 | Colocalization of A2M and ACTB :: SLC25A5 :: SLC25A6 :: MA |                                    | Homo sapiens | colocalization       | protein - protein |
| P01023 | A2M                                                        | physically interacts with CDK2AP2  | Homo sapiens | physical interaction | protein - protein |
| P01023 | A2M                                                        | physically interacts with TSC22D1  | Homo sapiens | physical interaction | protein - protein |
| P01023 | A2M                                                        | physically interacts with TTR      | Homo sapiens | physical interaction | protein - protein |
| P01023 | IL4                                                        | physically interacts with A2M      | Homo sapiens | physical interaction | protein - protein |
| P01023 | NGF                                                        | physically interacts with A2M      | Homo sapiens | physical interaction | protein - protein |
| P01023 | CYP2C18                                                    | physically interacts with A2M      | Homo sapiens | physical interaction | protein - protein |
| P01023 | A2M                                                        | interacts with TNFRSF14            | Homo sapiens | physical association | protein - protein |
| P01023 | PRAM1                                                      | physically interacts with A2M      | Homo sapiens | physical interaction | protein - protein |
| P01023 | MGEA5                                                      | physically interacts with A2M      | Homo sapiens | physical interaction | protein - protein |
| P01023 | RAB3A                                                      | physically interacts with A2M      | Homo sapiens | physical interaction | protein - protein |
| P01023 | A2M                                                        | interacts with TGIF1               | Homo sapiens | physical association | protein - protein |
| P01023 | SHBG                                                       | physically interacts with A2M      | Homo sapiens | physical interaction | protein - protein |
| P01023 | FBXL12                                                     | physically interacts with A2M      | Homo sapiens | physical interaction | protein - protein |
| P01023 | A2M                                                        | interacts with TK1                 | Homo sapiens | physical association | protein - protein |
| P01023 | LONP1                                                      | physically interacts with A2M      | Homo sapiens | physical interaction | protein - protein |
| P01023 | ELANE                                                      | interacts with A2M                 | Homo sapiens | physical association | protein - protein |
| P01023 | A2M                                                        | physically interacts with TNFRSF14 | Homo sapiens | physical interaction | protein - protein |
| P01023 | A2M                                                        | physically interacts with MMP2     | Homo sapiens | physical interaction | protein - protein |
| P01023 | STAMBPL1                                                   | physically interacts with A2M      | Homo sapiens | physical interaction | protein - protein |
| P01023 | A2M                                                        | physically interacts with CDKN1A   | Homo sapiens | physical interaction | protein - protein |

|        |                                       |              |                      |                   |
|--------|---------------------------------------|--------------|----------------------|-------------------|
| P01023 | SWSAP1 physically interacts with A2M  | Homo sapiens | physical interaction | protein - protein |
| P01023 | A2M interacts with AMBP               | Homo sapiens | physical association | protein - protein |
| P01023 | HIPK1 interacts with A2M              | Homo sapiens | physical association | protein - protein |
| P01023 | PAXIP1 physically interacts with A2M  | Homo sapiens | physical interaction | protein - protein |
| P01023 | RAP1B interacts with A2M              | Homo sapiens | physical association | protein - protein |
| P01023 | A2M physically interacts with KLK13   | Homo sapiens | physical association | protein - protein |
| P01023 | CDK7 interacts with A2M               | Homo sapiens | physical association | protein - protein |
| P01023 | A2M physically interacts with MAST1   | Homo sapiens | physical interaction | protein - protein |
| P01023 | MAPK6 interacts with A2M              | Homo sapiens | physical association | protein - protein |
| P01023 | C11orf58 interacts with A2M           | Homo sapiens | physical association | protein - protein |
| P01023 | A2M physically interacts with HMOX2   | Homo sapiens | physical interaction | protein - protein |
| P01023 | A2M physically interacts with A2M     | Homo sapiens | physical interaction | protein - protein |
| P01023 | CDK11A interacts with A2M             | Homo sapiens | physical association | protein - protein |
| P01023 | A2M physically interacts with TK1     | Homo sapiens | physical interaction | protein - protein |
| P01023 | ENO2 physically interacts with A2M    | Homo sapiens | physical interaction | protein - protein |
| P01023 | A2M interacts with TSC22D1            | Homo sapiens | physical association | protein - protein |
| P01023 | AP1M2 physically interacts with A2M   | Homo sapiens | physical interaction | protein - protein |
| P01023 | A2M physically interacts with TGM2    | Homo sapiens | physical interaction | protein - protein |
| P01023 | TRAPPC5 physically interacts with A2M | Homo sapiens | physical interaction | protein - protein |
| P01023 | MYOC physically interacts with A2M    | Homo sapiens | physical interaction | protein - protein |
| P01023 | A2M physically interacts with RPP14   | Homo sapiens | physical interaction | protein - protein |
| P01023 | Complex of 3 interactors              | Homo sapiens | cleavage reaction    | protein - protein |
| P01023 | IFIT5 physically interacts with A2M   | Homo sapiens | physical interaction | protein - protein |
| P01023 | ACTB physically interacts with A2M    | Homo sapiens | physical interaction | protein - protein |
| P01023 | A2M interacts with HMOX2              | Homo sapiens | physical association | protein - protein |
| P01023 | GCDH physically interacts with A2M    | Homo sapiens | physical interaction | protein - protein |
| P01023 | A2M physically interacts with CPB2    | Homo sapiens | physical interaction | protein - protein |
| P01023 | IFIT3 physically interacts with A2M   | Homo sapiens | physical interaction | protein - protein |
| P01023 | SEPT8 interacts with A2M              | Homo sapiens | physical association | protein - protein |
| P01023 | RETN physically interacts with A2M    | Homo sapiens | physical interaction | protein - protein |
| P01023 | APOE interacts with A2M               | Homo sapiens | physical association | protein - protein |
| P01023 | TYRO3 physically interacts with A2M   | Homo sapiens | physical interaction | protein - protein |
| P01023 | A2M physically interacts with NUDT21  | Homo sapiens | physical interaction | protein - protein |
| P01023 | FARSA physically interacts with A2M   | Homo sapiens | physical interaction | protein - protein |
| P01023 | A2M physically interacts with SMN1    | Homo sapiens | physical interaction | protein - protein |
| P01023 | LEP physically interacts with A2M     | Homo sapiens | physical interaction | protein - protein |
| P01023 | EVI5L physically interacts with A2M   | Homo sapiens | physical interaction | protein - protein |
| P01023 | A2M interacts with IL8                | Homo sapiens | physical association | protein - protein |
| P01023 | A2M interacts with CDKN1A             | Homo sapiens | physical association | protein - protein |
| P01023 | A2M interacts with IL10               | Homo sapiens | physical association | protein - protein |
| P01023 | RHEB physically interacts with A2M    | Homo sapiens | physical interaction | protein - protein |
| P01023 | RAD23A physically interacts with A2M  | Homo sapiens | physical interaction | protein - protein |
| P01023 | A2M physically interacts with B2M     | Homo sapiens | physical interaction | protein - protein |
| P01023 | A2M physically interacts with TGF1    | Homo sapiens | physical interaction | protein - protein |
| P01023 | UMPS physically interacts with A2M    | Homo sapiens | physical interaction | protein - protein |
| P01023 | DNAJB1 physically interacts with A2M  | Homo sapiens | physical interaction | protein - protein |
| P01023 | A2M interacts with IL2                | Homo sapiens | physical association | protein - protein |
| P01023 | IL6 interacts with A2M                | Homo sapiens | physical association | protein - protein |
| P01023 | A2M interacts with TNF                | Homo sapiens | physical association | protein - protein |
| P01023 | A2M interacts with ANXA7              | Homo sapiens | physical association | protein - protein |
| P01023 | A2M interacts with TGFB2              | Homo sapiens | physical association | protein - protein |
| P01023 | PDGFB interacts with A2M              | Homo sapiens | physical association | protein - protein |
| P01023 | PAEP interacts with A2M               | Homo sapiens | association          | protein - protein |
| P01023 | A2M interacts with TGFB1              | Homo sapiens | physical association | protein - protein |
| P01023 | A2M physically interacts with GRB2    | Homo sapiens | physical interaction | protein - protein |

|        |                                        |                           |                      |                   |
|--------|----------------------------------------|---------------------------|----------------------|-------------------|
| P01023 | A2M interacts with FGF2                | Homo sapiens              | physical association | protein - protein |
| P01023 | A2M interacts with NGF                 | Homo sapiens              | physical association | protein - protein |
| P01023 | ATF7IP interacts with A2M              | Homo sapiens              | physical association | protein - protein |
| P01023 | A2M physically interacts with C11orf58 | Homo sapiens              | physical interaction | protein - protein |
| P01023 | A2M physically interacts with UFD1L    | Homo sapiens              | physical interaction | protein - protein |
| P01023 | A2M physically interacts with ANXA7    | Homo sapiens              | physical interaction | protein - protein |
| P01023 | A2M interacts with CDK2AP2             | Homo sapiens              | physical association | protein - protein |
| P01023 | TUBA1B physically interacts with A2M   | Homo sapiens              | physical interaction | protein - protein |
| P01023 | A2M interacts with RPP14               | Homo sapiens              | physical association | protein - protein |
| P01023 | A2M interacts with LRP1                | Homo sapiens              | association          | protein - protein |
| P01023 | A2M interacts with UFD1L               | Homo sapiens              | physical association | protein - protein |
| P01023 | Complex of 34 interactors              | Homo sapiens              | colocalization       | protein - protein |
| P01023 | A2M interacts with IL4                 | Homo sapiens              | physical association | protein - protein |
| P01023 | A2M interacts with IL18                | Homo sapiens/Mus musculus | physical association | protein - protein |
| P01023 | A2M interacts with IL6                 | Homo sapiens/Mus musculus | physical association | protein - protein |
| P01023 | A2M interacts with Tnf                 | Homo sapiens/Mus musculus | physical association | protein - protein |
| P01023 | FBXO6 interacts with A2M               | Homo sapiens              | physical association | protein - protein |
| P02768 | OBSL1 interacts with ALB               | Homo sapiens              | physical association | protein - protein |
| P02768 | CROT interacts with ALB                | Homo sapiens              | physical association | protein - protein |
| P02768 | PRSS3 interacts with ALB               | Homo sapiens              | physical association | protein - protein |
| P02768 | HBA2 interacts with ALB                | Homo sapiens              | physical association | protein - protein |
| P02768 | ALB physically interacts with NR5A2    | Homo sapiens              | physical interaction | protein - protein |
| P02768 | PLAG1 interacts with ALB               | Homo sapiens              | physical association | protein - protein |
| P02768 | SPAST interacts with ALB               | Homo sapiens              | physical association | protein - protein |
| P02768 | Complex of 247 interactors             | Homo sapiens              | association          | protein - protein |
| P02768 | KRT14 interacts with ALB               | Homo sapiens              | physical association | protein - protein |
| P02768 | APOA1 interacts with ALB               | Homo sapiens              | physical association | protein - protein |
| P02768 | DERL1 interacts with ALB               | Homo sapiens              | physical association | protein - protein |
| P02768 | RLF interacts with ALB                 | Homo sapiens              | physical association | protein - protein |
| P02768 | AP4E1 interacts with ALB               | Homo sapiens              | physical association | protein - protein |
| P02768 | PARK2 interacts with ALB               | Homo sapiens              | physical association | protein - protein |
| P02768 | ALB physically associates with ALB     | Homo sapiens              | physical association | protein - protein |
| P02768 | ITGA2 interacts with ALB               | Homo sapiens              | physical association | protein - protein |
| P02768 | PPBP interacts with ALB                | Homo sapiens              | physical association | protein - protein |
| P02768 | KRT16 interacts with ALB               | Homo sapiens              | physical association | protein - protein |
| P02768 | RYR2 interacts with ALB                | Homo sapiens              | physical association | protein - protein |
| P02768 | SLC25A13 interacts with ALB            | Homo sapiens              | physical association | protein - protein |
| P02768 | RANBP3 interacts with ALB              | Homo sapiens              | physical association | protein - protein |
| P02768 | EXOC6 interacts with ALB               | Homo sapiens              | physical association | protein - protein |
| P02768 | CEP44 interacts with ALB               | Homo sapiens              | physical association | protein - protein |
| P02768 | CLCA2 interacts with ALB               | Homo sapiens              | physical association | protein - protein |
| P02768 | FN1 interacts with ALB                 | Homo sapiens              | physical association | protein - protein |
| P02768 | IGHG2 interacts with ALB               | Homo sapiens              | physical association | protein - protein |
| P02768 | LAT interacts with ALB                 | Homo sapiens              | physical association | protein - protein |
| P02768 | Complex of 103 interactors             | Homo sapiens              | physical association | protein - protein |
| P02768 | HP interacts with ALB                  | Homo sapiens              | physical association | protein - protein |
| P02768 | APOA2 interacts with ALB               | Homo sapiens              | physical association | protein - protein |
| P02768 | OR3A2 interacts with ALB               | Homo sapiens              | physical association | protein - protein |
| P02768 | KAT2B interacts with ALB               | Homo sapiens              | physical association | protein - dna     |
| P02768 | ELP3 interacts with ALB                | Homo sapiens              | physical association | protein - dna     |
| P02768 | CRB1 interacts with ALB                | Homo sapiens              | physical association | protein - protein |
| P02768 | AMPD3 interacts with ALB               | Homo sapiens              | physical association | protein - protein |
| P02768 | PLA2G4F interacts with ALB             | Homo sapiens              | physical association | protein - protein |
| P02768 | CAMTA1 interacts with ALB              | Homo sapiens              | physical association | protein - protein |
| P02768 | QTRTD1 interacts with ALB              | Homo sapiens              | physical association | protein - protein |

|        |         |                                |              |                      |                   |
|--------|---------|--------------------------------|--------------|----------------------|-------------------|
| P02768 | FAM71E2 | interacts with ALB             | Homo sapiens | physical association | protein - protein |
| P02768 | JARID2  | interacts with ALB             | Homo sapiens | physical association | protein - protein |
| P02768 | H3F3A   | interacts with ALB             | Homo sapiens | physical association | protein - dna     |
| P02768 | SMARCA5 | interacts with ALB             | Homo sapiens | physical association | protein - dna     |
| P02768 | ALB     | interacts with HNF1A           | Homo sapiens | physical association | protein - dna     |
| P02768 | ZNF558  | interacts with ALB             | Homo sapiens | physical association | protein - protein |
| P02768 | SMARCA4 | interacts with ALB             | Homo sapiens | physical association | protein - dna     |
| P02768 | GSN     | interacts with ALB             | Homo sapiens | physical association | protein - protein |
| P02768 | DGKG    | interacts with ALB             | Homo sapiens | physical association | protein - protein |
| P02768 | TTN     | interacts with ALB             | Homo sapiens | physical association | protein - protein |
| P02768 | CDC45   | interacts with ALB             | Homo sapiens | physical association | protein - protein |
| P02768 | GJC2    | interacts with ALB             | Homo sapiens | physical association | protein - protein |
| P02768 | AGA     | interacts with ALB             | Homo sapiens | physical association | protein - protein |
| P02768 | OR2T6   | interacts with ALB             | Homo sapiens | physical association | protein - protein |
| P02768 | ALB     | interacts with CEBPB           | Homo sapiens | physical association | protein - dna     |
| P02768 | SLA2    | interacts with ALB             | Homo sapiens | physical association | protein - protein |
| P02768 | ALB     | interacts with UBD             | Homo sapiens | physical association | protein - protein |
| P02768 | SGOL2   | interacts with ALB             | Homo sapiens | physical association | protein - protein |
| P02768 | MYL4    | interacts with ALB             | Homo sapiens | physical association | protein - protein |
| P02768 | IL7R    | interacts with ALB             | Homo sapiens | physical association | protein - protein |
| P02768 | ALB     | interacts with USP37           | Homo sapiens | physical association | protein - protein |
| P02768 | AHSG    | interacts with ALB             | Homo sapiens | physical association | protein - protein |
| P02768 | HIST4H4 | interacts with ALB             | Homo sapiens | physical association | protein - dna     |
| P02768 | C4A     | interacts with ALB             | Homo sapiens | physical association | protein - protein |
| P02768 | PCDH1   | interacts with ALB             | Homo sapiens | physical association | protein - protein |
| P02768 | ITGB5   | interacts with ALB             | Homo sapiens | physical association | protein - protein |
| P02768 | ALB     | physically interacts with IMMT | Homo sapiens | physical interaction | protein - protein |
| P02768 | IGHG1   | interacts with ALB             | Homo sapiens | physical association | protein - protein |
| P02768 | THRAP3  | interacts with ALB             | Homo sapiens | physical association | protein - protein |
| P02768 | APOE    | interacts with ALB             | Homo sapiens | physical association | protein - protein |
| P02768 | APOC1   | interacts with ALB             | Homo sapiens | physical association | protein - protein |
| P02768 | KRT6B   | interacts with ALB             | Homo sapiens | physical association | protein - protein |
| P02768 | ZNF292  | interacts with ALB             | Homo sapiens | physical association | protein - protein |
| P02768 | CFD     | interacts with ALB             | Homo sapiens | physical association | protein - protein |
| P02768 | DCD     | interacts with ALB             | Homo sapiens | physical association | protein - protein |
| P02768 | DICER1  | interacts with ALB             | Homo sapiens | physical association | protein - protein |
| P02768 | APOC3   | interacts with ALB             | Homo sapiens | physical association | protein - protein |
| P02768 | KRT1    | interacts with ALB             | Homo sapiens | physical association | protein - protein |
| P02768 | ALB     | interacts with YWHAG           | Homo sapiens | physical association | protein - protein |
| P02768 | CNOT1   | interacts with ALB             | Homo sapiens | physical association | protein - protein |
| P02768 | GCN1L1  | interacts with ALB             | Homo sapiens | physical association | protein - protein |
| P02768 | ALB     | interacts with TK1             | Homo sapiens | physical association | protein - protein |
| P02768 | PAN2    | interacts with ALB             | Homo sapiens | physical association | protein - protein |
| P02768 | KLK3    | interacts with ALB             | Homo sapiens | physical association | protein - protein |
| P02768 | ALB     | interacts with IQCB1           | Homo sapiens | physical association | protein - protein |
| P02768 | OR8D2   | interacts with ALB             | Homo sapiens | physical association | protein - protein |
| P02768 | TIAM1   | interacts with ALB             | Homo sapiens | physical association | protein - protein |
| P02768 | SCAF1   | interacts with ALB             | Homo sapiens | physical association | protein - protein |
| P02768 | TTPAL   | interacts with ALB             | Homo sapiens | physical association | protein - protein |
| P02768 | APOC4   | interacts with ALB             | Homo sapiens | physical association | protein - protein |
| P02768 | KCNMA1  | interacts with ALB             | Homo sapiens | physical association | protein - protein |
| P02768 | BBC3    | interacts with ALB             | Homo sapiens | physical association | protein - protein |
| P02768 | DDB1    | interacts with ALB             | Homo sapiens | physical association | protein - protein |
| P02768 | SETX    | interacts with ALB             | Homo sapiens | physical association | protein - protein |
| P02768 | PFDN1   | interacts with ALB             | Homo sapiens | physical association | protein - protein |

|        |                                                                                                                                                                                                                                                                                                                                                                                                                                                                                                                                                                                                                                                                                                                                                                                                                                                                                                                                                                                                                                                               |              |                      |                   |
|--------|---------------------------------------------------------------------------------------------------------------------------------------------------------------------------------------------------------------------------------------------------------------------------------------------------------------------------------------------------------------------------------------------------------------------------------------------------------------------------------------------------------------------------------------------------------------------------------------------------------------------------------------------------------------------------------------------------------------------------------------------------------------------------------------------------------------------------------------------------------------------------------------------------------------------------------------------------------------------------------------------------------------------------------------------------------------|--------------|----------------------|-------------------|
| P02768 | KRT10 interacts with ALB                                                                                                                                                                                                                                                                                                                                                                                                                                                                                                                                                                                                                                                                                                                                                                                                                                                                                                                                                                                                                                      | Homo sapiens | physical association | protein - protein |
| P02768 | CFH interacts with ALB                                                                                                                                                                                                                                                                                                                                                                                                                                                                                                                                                                                                                                                                                                                                                                                                                                                                                                                                                                                                                                        | Homo sapiens | physical association | protein - protein |
| P02768 | FCGRT physically interacts with ALB                                                                                                                                                                                                                                                                                                                                                                                                                                                                                                                                                                                                                                                                                                                                                                                                                                                                                                                                                                                                                           | Homo sapiens | physical interaction | protein - protein |
| P02768 | MYLK3 interacts with ALB                                                                                                                                                                                                                                                                                                                                                                                                                                                                                                                                                                                                                                                                                                                                                                                                                                                                                                                                                                                                                                      | Homo sapiens | physical association | protein - protein |
| P02768 | IGDCC4 interacts with ALB                                                                                                                                                                                                                                                                                                                                                                                                                                                                                                                                                                                                                                                                                                                                                                                                                                                                                                                                                                                                                                     | Homo sapiens | physical association | protein - protein |
| P02768 | APP physically interacts with ALB                                                                                                                                                                                                                                                                                                                                                                                                                                                                                                                                                                                                                                                                                                                                                                                                                                                                                                                                                                                                                             | Homo sapiens | physical interaction | protein - protein |
| P02768 | CDCP1 interacts with ALB                                                                                                                                                                                                                                                                                                                                                                                                                                                                                                                                                                                                                                                                                                                                                                                                                                                                                                                                                                                                                                      | Homo sapiens | physical association | protein - protein |
| P02768 | TFRC physically interacts with ALB                                                                                                                                                                                                                                                                                                                                                                                                                                                                                                                                                                                                                                                                                                                                                                                                                                                                                                                                                                                                                            | Homo sapiens | physical interaction | protein - protein |
| P02768 | ALB physically associates with ALB                                                                                                                                                                                                                                                                                                                                                                                                                                                                                                                                                                                                                                                                                                                                                                                                                                                                                                                                                                                                                            | Homo sapiens | physical association | protein - protein |
| P02768 | ST13 interacts with ALB                                                                                                                                                                                                                                                                                                                                                                                                                                                                                                                                                                                                                                                                                                                                                                                                                                                                                                                                                                                                                                       | Homo sapiens | physical association | protein - protein |
| P02768 | ADRA1B interacts with ALB                                                                                                                                                                                                                                                                                                                                                                                                                                                                                                                                                                                                                                                                                                                                                                                                                                                                                                                                                                                                                                     | Homo sapiens | physical association | protein - protein |
| P02768 | CABLES1 interacts with ALB                                                                                                                                                                                                                                                                                                                                                                                                                                                                                                                                                                                                                                                                                                                                                                                                                                                                                                                                                                                                                                    | Homo sapiens | physical association | protein - protein |
| P02768 | ALB physically interacts with TK1                                                                                                                                                                                                                                                                                                                                                                                                                                                                                                                                                                                                                                                                                                                                                                                                                                                                                                                                                                                                                             | Homo sapiens | physical interaction | protein - protein |
| P02768 | APOA4 interacts with ALB                                                                                                                                                                                                                                                                                                                                                                                                                                                                                                                                                                                                                                                                                                                                                                                                                                                                                                                                                                                                                                      | Homo sapiens | physical association | protein - protein |
| P02768 | ITIH1 interacts with ALB                                                                                                                                                                                                                                                                                                                                                                                                                                                                                                                                                                                                                                                                                                                                                                                                                                                                                                                                                                                                                                      | Homo sapiens | physical association | protein - protein |
| P02768 | LDB3 interacts with ALB                                                                                                                                                                                                                                                                                                                                                                                                                                                                                                                                                                                                                                                                                                                                                                                                                                                                                                                                                                                                                                       | Homo sapiens | physical association | protein - protein |
| P02768 | NPHS1 interacts with ALB                                                                                                                                                                                                                                                                                                                                                                                                                                                                                                                                                                                                                                                                                                                                                                                                                                                                                                                                                                                                                                      | Homo sapiens | physical association | protein - protein |
| P02768 | TTR interacts with ALB                                                                                                                                                                                                                                                                                                                                                                                                                                                                                                                                                                                                                                                                                                                                                                                                                                                                                                                                                                                                                                        | Homo sapiens | physical association | protein - protein |
| P02768 | PF4V1 interacts with ALB                                                                                                                                                                                                                                                                                                                                                                                                                                                                                                                                                                                                                                                                                                                                                                                                                                                                                                                                                                                                                                      | Homo sapiens | physical association | protein - protein |
| P02768 | GABBR1 interacts with ALB                                                                                                                                                                                                                                                                                                                                                                                                                                                                                                                                                                                                                                                                                                                                                                                                                                                                                                                                                                                                                                     | Homo sapiens | physical association | protein - protein |
| P02768 | SLC9A8 interacts with ALB                                                                                                                                                                                                                                                                                                                                                                                                                                                                                                                                                                                                                                                                                                                                                                                                                                                                                                                                                                                                                                     | Homo sapiens | physical association | protein - protein |
| P02768 | PDE4B interacts with ALB                                                                                                                                                                                                                                                                                                                                                                                                                                                                                                                                                                                                                                                                                                                                                                                                                                                                                                                                                                                                                                      | Homo sapiens | physical association | protein - protein |
| P02768 | F2 interacts with ALB                                                                                                                                                                                                                                                                                                                                                                                                                                                                                                                                                                                                                                                                                                                                                                                                                                                                                                                                                                                                                                         | Homo sapiens | physical association | protein - protein |
| P02768 | CTSL1 interacts with ALB                                                                                                                                                                                                                                                                                                                                                                                                                                                                                                                                                                                                                                                                                                                                                                                                                                                                                                                                                                                                                                      | Homo sapiens | physical association | protein - protein |
| P02768 | CHKB interacts with ALB                                                                                                                                                                                                                                                                                                                                                                                                                                                                                                                                                                                                                                                                                                                                                                                                                                                                                                                                                                                                                                       | Homo sapiens | physical association | protein - protein |
| P02768 | ALB interacts with UBC                                                                                                                                                                                                                                                                                                                                                                                                                                                                                                                                                                                                                                                                                                                                                                                                                                                                                                                                                                                                                                        | Homo sapiens | physical association | protein - protein |
| P02768 | HPX interacts with ALB                                                                                                                                                                                                                                                                                                                                                                                                                                                                                                                                                                                                                                                                                                                                                                                                                                                                                                                                                                                                                                        | Homo sapiens | physical association | protein - protein |
| P02768 | ALB physically interacts with PFDN1                                                                                                                                                                                                                                                                                                                                                                                                                                                                                                                                                                                                                                                                                                                                                                                                                                                                                                                                                                                                                           | Homo sapiens | physical interaction | protein - protein |
|        | E2F3 interacts with RFC1 :: RHOT1 :: RHOT2 :: PCLO :: INTS5<br>:: GPR116 :: GPAM :: GPD2 :: SLC16A3 :: LBR :: TCF7L2 ::<br>CLASP1 :: CEBPZ :: KAT2A :: SLC25A5 :: DHX33 :: RAB13 ::<br>ATP2A2 :: SLC25A3 :: NOC2L :: TECR :: L3MBTL3 :: ZNF300 ::<br>ZC3H11A :: NUP98 :: MYBBP1A :: XRCC5 :: RPS3 :: SEC61A1<br>:: AGPAT5 :: MYO6 :: IMPA1 :: NUP205 :: INTS3 :: NUMA1 ::<br>TCERG1 :: SCD :: PRKDC :: EEF1A1 :: CTNNA1 :: MSH6 ::<br>MRP63 :: LMNA :: NCAPG :: SHOC2 :: KDM1A :: DHX9 ::<br>ENOX2 :: NAT10 :: RB1 :: CTNNA1 :: NCL :: HADHA :: PMM1<br>:: ZFYVE20 :: ALB :: MYO1B :: INTS6 :: ATP1A1 :: EFTUD2 ::<br>TRIM28 :: HLTFF :: CPT1A :: SUN2 :: SFMBT1 :: KRT14 :: MSH2<br>:: HSPA6 :: DDX21 :: PARP1 :: HSPA9 :: GTPBP2 :: AFG3L2 ::<br>HSPA5 :: TNXB :: SLC25A4 :: XRCC6 :: NOTCH3 :: HELLS ::<br>CCDC9 :: TRRAP :: STT3A :: ZNF148 :: LRPPRC :: SLC27A4 ::<br>SMPD4 :: ATAD3A :: SLC25A6 :: SLC2A1 :: DHCR7 :: IMMT ::<br>TFRC :: PGAP1 :: MATR3 :: DDB1 :: TRIM23 :: KRT1 :: ZBED4<br>:: ACADS :: HNRNPU :: UBA52 :: AHCTF1 :: NUP93 :: ALPI :: |              |                      |                   |
| P02768 | SMARCA1 :: AKAP8 :: POLG :: SP1 :: WRN                                                                                                                                                                                                                                                                                                                                                                                                                                                                                                                                                                                                                                                                                                                                                                                                                                                                                                                                                                                                                        | Homo sapiens | association          | protein - protein |
| P02768 | PRB3 physically interacts with ALB                                                                                                                                                                                                                                                                                                                                                                                                                                                                                                                                                                                                                                                                                                                                                                                                                                                                                                                                                                                                                            | Homo sapiens | physical interaction | protein - protein |
| P02768 | NLRC4 interacts with ALB                                                                                                                                                                                                                                                                                                                                                                                                                                                                                                                                                                                                                                                                                                                                                                                                                                                                                                                                                                                                                                      | Homo sapiens | physical association | protein - protein |
| P02768 | GFAP interacts with ALB                                                                                                                                                                                                                                                                                                                                                                                                                                                                                                                                                                                                                                                                                                                                                                                                                                                                                                                                                                                                                                       | Homo sapiens | physical association | protein - protein |
| P02768 | SPATA31A7 interacts with ALB                                                                                                                                                                                                                                                                                                                                                                                                                                                                                                                                                                                                                                                                                                                                                                                                                                                                                                                                                                                                                                  | Homo sapiens | physical association | protein - protein |
| P02768 | Complex of 8 interactors                                                                                                                                                                                                                                                                                                                                                                                                                                                                                                                                                                                                                                                                                                                                                                                                                                                                                                                                                                                                                                      | Homo sapiens | association          | protein - protein |
| P02768 | ALB interacts with AMBP                                                                                                                                                                                                                                                                                                                                                                                                                                                                                                                                                                                                                                                                                                                                                                                                                                                                                                                                                                                                                                       | Homo sapiens | physical association | protein - protein |
| P02768 | AP1M1 interacts with ALB                                                                                                                                                                                                                                                                                                                                                                                                                                                                                                                                                                                                                                                                                                                                                                                                                                                                                                                                                                                                                                      | Homo sapiens | physical association | protein - protein |
| P02768 | TLN2 interacts with ALB                                                                                                                                                                                                                                                                                                                                                                                                                                                                                                                                                                                                                                                                                                                                                                                                                                                                                                                                                                                                                                       | Homo sapiens | physical association | protein - protein |

|        |                                             |                           |                      |                   |
|--------|---------------------------------------------|---------------------------|----------------------|-------------------|
| P02768 | ZNF232 interacts with ALB                   | Homo sapiens              | physical association | protein - protein |
| P02768 | LUC7L2 physically interacts with ALB        | Homo sapiens              | physical interaction | protein - protein |
| P02768 | ALB interacts with PSMA3                    | Homo sapiens              | physical association | protein - protein |
| P02768 | FBXO25 interacts with ALB                   | Homo sapiens              | physical association | protein - protein |
| P02768 | SACS interacts with ALB                     | Homo sapiens              | physical association | protein - protein |
| P02768 | ALB interacts with PSMD4                    | Homo sapiens              | physical association | protein - protein |
| P02768 | F7 interacts with ALB                       | Homo sapiens              | physical association | protein - protein |
| P02768 | KIAA0232 interacts with ALB                 | Homo sapiens              | physical association | protein - protein |
| P02768 | NCOA3 interacts with ALB                    | Homo sapiens              | physical association | protein - protein |
| P02768 | ALB interacts with DMWD                     | Homo sapiens              | physical association | protein - protein |
| P02768 | KRT5 interacts with ALB                     | Homo sapiens              | physical association | protein - protein |
| P02768 | RANBP2 interacts with ALB                   | Homo sapiens              | physical association | protein - protein |
| P02768 | ALB interacts with EEF2K                    | Homo sapiens              | physical association | protein - protein |
| P02768 | CTAGE5 interacts with ALB                   | Homo sapiens              | physical association | protein - protein |
| P02768 | SH3BP5 interacts with ALB                   | Homo sapiens              | physical association | protein - protein |
| P02768 | ALB interacts with UIMC1                    | Homo sapiens              | physical association | protein - protein |
| P02768 | DMD interacts with ALB                      | Homo sapiens              | physical association | protein - protein |
| P02768 | PDZRN4 interacts with ALB                   | Homo sapiens              | physical association | protein - protein |
| P02768 | PEG3 interacts with ALB                     | Homo sapiens              | physical association | protein - protein |
| P02768 | ATM interacts with ALB                      | Homo sapiens              | physical association | protein - protein |
| P02768 | ALB interacts with IMMT                     | Homo sapiens              | physical association | protein - protein |
| P02768 | PRSS1 interacts with ALB                    | Homo sapiens              | physical association | protein - protein |
| P02768 | ETF1 interacts with ALB                     | Homo sapiens              | physical association | protein - protein |
| P02768 | TRAPPC11 interacts with ALB                 | Homo sapiens              | physical association | protein - protein |
| P02768 | SCN5A interacts with ALB                    | Homo sapiens              | physical association | protein - protein |
| P02768 | GRAP2 interacts with ALB                    | Homo sapiens              | physical association | protein - protein |
| P02768 | PHC3 interacts with ALB                     | Homo sapiens              | physical association | protein - protein |
| P02768 | PALB2 interacts with ALB                    | Homo sapiens              | physical association | protein - protein |
| P02768 | SORBS3 interacts with ALB                   | Homo sapiens              | physical association | protein - protein |
| P02768 | SERPING1 interacts with ALB                 | Homo sapiens              | physical association | protein - protein |
| P02768 | FUS interacts with ALB                      | Homo sapiens              | physical association | protein - protein |
| P02768 | KRT13 interacts with ALB                    | Homo sapiens              | physical association | protein - protein |
| P02768 | CST3 interacts with ALB                     | Homo sapiens              | physical association | protein - protein |
| P02768 | ALB interacts with CRYAB                    | Homo sapiens              | physical association | protein - protein |
| P02768 | DCC interacts with ALB                      | Homo sapiens              | physical association | protein - protein |
| P02768 | KRT9 interacts with ALB                     | Homo sapiens              | physical association | protein - protein |
| P02768 | KRT6A interacts with ALB                    | Homo sapiens              | physical association | protein - protein |
| P02768 | CACNA1I interacts with ALB                  | Homo sapiens              | physical association | protein - protein |
| P02768 | SLC1A5 interacts with ALB                   | Homo sapiens              | physical association | protein - protein |
| P02768 | TSC22D1 interacts with ALB                  | Homo sapiens              | physical association | protein - protein |
| P02768 | CFB interacts with ALB                      | Homo sapiens              | physical association | protein - protein |
| P02768 | FGA interacts with ALB                      | Homo sapiens              | physical association | protein - protein |
| P02768 | FCGRT interacts with ALB                    | Homo sapiens              | association          | protein - protein |
| P09237 | CD44 interacts with MMP7                    | Homo sapiens              | physical association | protein - protein |
| P09237 | MMP7 physically interacts with FASLG        | Homo sapiens              | physical interaction | protein - protein |
| P09237 | ZBTB33 interacts with MMP7                  | Homo sapiens              | physical association | protein - dna     |
| P09237 | HBEGF interacts with MMP7                   | Homo sapiens              | physical association | protein - protein |
| P09237 | Cleavage reaction involving DEFB4A and MMP7 | Homo sapiens              | cleavage reaction    | protein - protein |
| P09237 | Cleavage reaction involving MMP7 and Defb2  | Homo sapiens/Mus musculus | cleavage reaction    | protein - protein |
| P09237 | Cleavage reaction involving DEFA1 and MMP7  | Homo sapiens              | cleavage reaction    | protein - protein |
| P09237 | Cleavage reaction involving DEFB1 and MMP7  | Homo sapiens              | cleavage reaction    | protein - protein |
| P09237 | Cleavage reaction involving MMP7 and Defb1  | Homo sapiens/Mus musculus | cleavage reaction    | protein - protein |
| P09237 | MMP7 physically interacts with BCAN         | Homo sapiens              | physical interaction | protein - protein |
| P09237 | MMP7 interacts with FASLG                   | Homo sapiens              | physical association | protein - protein |
| P15086 | CPB1 physically associates with CPB1        | Homo sapiens              | physical association | protein - protein |

|        |                                            |              |                                                    |                   |
|--------|--------------------------------------------|--------------|----------------------------------------------------|-------------------|
| P21399 | Colocalization of ACO1 and PSMG1           | Homo sapiens | colocalization                                     | protein - protein |
| P21399 | APP physically interacts with ACO1         | Homo sapiens | physical interaction                               | protein - protein |
| P21399 | Genetic interaction between ACO1 and HDAC7 | Homo sapiens | additive genetic interaction defined by inequality | dna - dna         |
| P21399 | Colocalization of STRAP and ACO1           | Homo sapiens | colocalization                                     | protein - protein |
| P21399 | Colocalization of LGALS1 and ACO1          | Homo sapiens | colocalization                                     | protein - protein |
| P21399 | Colocalization of DCPS and ACO1            | Homo sapiens | colocalization                                     | protein - protein |
| P21399 | Colocalization of FUBP1 and ACO1           | Homo sapiens | colocalization                                     | protein - protein |
| P21399 | Colocalization of ACO1 and C12orf57        | Homo sapiens | colocalization                                     | protein - protein |
| P21399 | Colocalization of ACO1 and HIST1H2AE       | Homo sapiens | colocalization                                     | protein - protein |
| P21399 | ACO1 interacts with AKT1                   | Homo sapiens | physical association                               | protein - protein |
| P21399 | ACO1 interacts with POLR2F                 | Homo sapiens | transcriptional regulation                         | protein - dna     |
| P21399 | Colocalization of ACO1 and CTPS1           | Homo sapiens | colocalization                                     | protein - protein |
| P21399 | ACO1 interacts with UBC                    | Homo sapiens | physical association                               | protein - protein |
| P21399 | FBXL5 interacts with ACO1                  | Homo sapiens | physical association                               | protein - protein |
